# Supplementary material
Source: PubMed Central journal article supplement (PMC2528126)
Supplement: pp.108.123141_1.pdf [file pp.108.123141_1.pdf]

## Supplemental Table S1

Arabidopsis proteins whose *de novo* synthesis occurs during germination *sensu stricto* (1-d post-imbibition) of non-deteriorated control seeds (0d). % Cov, coverage; Exp, experimental; MW, molecular weight; Th, theoretical; AGI, Arabidopsis Genome Initiative.

| No. <sup>a</sup> | Arabidopsis Protein Name.                                                | AGI No.                | MW Exp (kDa) | pI Exp | MW Th (kDa) | pI Th | % Cov. |
|------------------|--------------------------------------------------------------------------|------------------------|--------------|--------|-------------|-------|--------|
| 1 <sup>b</sup>   | dnaK-type molecular chaperone BiP                                        | At5g42020              | 79.36        | 5.08   | 71.17       | 5.08  | 21%    |
| 3 <sup>b</sup>   | Enolase                                                                  | At1g74030              | 55.87        | 5.29   | 51.44       | 5.79  | 26%    |
| 4 <sup>b</sup>   | Tubulin beta 2 beta 3 chain                                              | At5g62700              | 57.35        | 4.89   | 50.70       | 4.70  | 35%    |
| 5 <sup>b</sup>   | Tubulin-alpha-3.5                                                        | At5g19770              | 57.86        | 5.11   | 49.62       | 4.95  | 23%    |
| 6 <sup>b</sup>   | Tubulin-alpha-2.4                                                        | At1g04820              | 54.71        | 5.06   | 49.51       | 4.93  | 52%    |
| 7 <sup>b</sup>   | 60S acidic ribosomal protein P0-B                                        | At3g09200              | 37.55        | 5.09   | 34.13       | 4.99  | 24%    |
| 8 <sup>b</sup>   | HSP 17.4                                                                 | At3g46230              | 17.93        | 4.99   | 17.45       | 5.20  | 25%    |
| 9 <sup>b</sup>   | HSP 17.7                                                                 | At5g12030              | 17.94        | 5.50   | 17.83       | 5.22  | 14%    |
| 10 <sup>b</sup>  | Ribulose biphosphate carboxylase large chain [Precursor] or rubisco      | AtCg00490              | 57.36        | 5.77   | 53.47       | 6.25  | 17%    |
| 11 <sup>b</sup>  | Em-like protein GEA1 (EM1)                                               | At3g51810              | 19.61        | 5.75   | 16.61       | 5.75  | 26%    |
| 13 <sup>b</sup>  | MLO-like-protein                                                         | At1g61560              | 72.97        | 6.3    | 67.21       | 10.06 | 15%    |
| 17 <sup>b</sup>  | Phosphoenol pyruvate carboxykinase                                       | At4g37870              | 73.40        | 6.58   | 73.40       | 6.61  | 17%    |
| 23 <sup>b</sup>  | Catalase 2                                                               | At4g35090              | 56.48        | 6.64   | 56.91       | 6.63  | 16%    |
| 24 <sup>b</sup>  | Actin 7                                                                  | At5g09810              | 42.94        | 5.06   | 41.96       | 5.26  | 23%    |
| 25 <sup>b</sup>  | Beta-cruciferin 12S (seed storage protein precursor fragment)            | At4g28520              | 23.32        | 6.89   | 21.20       | 6.19  | 27%    |
| 26 <sup>b</sup>  | Aconitate hydratase cytoplasmic                                          | At2g05710              | 96.38        | 5.75   | 98.15       | 5.79  | 34%    |
| 34 <sup>b</sup>  | Major latex protein                                                      | At1g14950              | 13.19        | 5.90   | 18.06       | 6.88  | 58%    |
| 36 <sup>b</sup>  | Glyceraldehyde-3-phosphate dehydrogenase. cytosolic                      | At3g04120              | 40.42        | 6.44   | 36.99       | 6.34  | 34%    |
| 37 <sup>b</sup>  | Glyceraldehyde-3-phosphate dehydrogenase. cytosolic                      | At3g04120              | 40.29        | 6.49   | 36.99       | 6.34  | 17%    |
| 38 <sup>b</sup>  | Aminopeptidase                                                           | At2g24200              | 59.99        | 5.61   | 54.49       | 5.72  | 27%    |
| 39 <sup>b</sup>  | Glyceraldehyde-3-phosphate dehydrogenase. cytosolic                      | At3g04120              | 38.52        | 6.23   | 36.99       | 6.34  | 26%    |
| 40 <sup>b</sup>  | Glyceraldehyde-3-phosphate dehydrogenase. cytosolic                      | At3g04120              | 38.55        | 6.26   | 36.99       | 6.34  | 27%    |
| 42 <sup>b</sup>  | Cell division cycle protein (CDC48)                                      | At3g09840 or At5g03340 | 96.32        | 5.21   | 89.34       | 5.13  | 35%    |
| 43 <sup>b</sup>  | Heat shock cognate 70 kDa protein 3                                      | At3g09440              | 78.90        | 5.06   | 71.13       | 4.69  | 15%    |
| 44 <sup>b</sup>  | Beta-cruciferin 12S (seed storage protein precursor fragment)            | At1g03880              | 16.14        | 7.42   | 20.80       | 7.03  | 7%     |
| 45 <sup>b</sup>  | HSP 70                                                                   | At1g16030              | 76.38        | 5.24   | 70.91       | 5.3   | 24%    |
| 46 <sup>b</sup>  | Jasmonate inducible protein-like                                         | At3g16460              | 77.81        | 5.29   | 72.46       | 5.17  | 10%    |
| 48 <sup>b</sup>  | Cupin family protein                                                     | At2g28490              | 72.99        | 4.99   | 55.69       | 6.08  | 25%    |
| 49 <sup>b</sup>  | S-adenosylmethionine synthetase                                          | At3g17390              | 42.67        | 5.51   | 42.79       | 5.51  | 19%    |
| 50 <sup>b</sup>  | Translation elongation factor Tu (chloroplast) (without transit peptide) | At4g20360              | 42.94        | 5.43   | 51.62       | 5.84  | 27%    |
| 56 <sup>b</sup>  | Late embryogenesis abundant (LEA)                                        | At3g22500              | 34.02        | 5.36   | 26.82       | 5.46  | 31%    |
| 58 <sup>b</sup>  | Jasmonate inducible protein-like                                         | At3g16420              | 36.28        | 5.49   | 32.16       | 5.46  | 41%    |
| 59 <sup>b</sup>  | Succinate dehydrogenase [ubiquinone] flavoprotein subunit. mitochondrial | At5g66760              | 66.68        | 5.39   | 69.64       | 6.24  | 16%    |
| 61 <sup>b</sup>  | Late embryogenesis abundant (LEA)                                        | At2g42560              | 66.68        | 5.78   | 67.19       | 5.78  | 43%    |
| 62 <sup>b</sup>  | S-adenosylmethionine synthetase 2                                        | At4g01850              | 43.25        | 5.67   | 43.24       | 5.94  | 30%    |
| 64 <sup>b</sup>  | Elongation factor 1-beta-gamma                                           | At1g09640              | 41.75        | 5.66   | 46.64       | 5.13  | 17%    |

## Supplemental Table S1 (continued)

Arabidopsis proteins whose *de novo* synthesis occurs during germination *sensu stricto* (1-d post-imbibition) of non-deteriorated control seeds (Od). % Cov, coverage; Exp, experimental; MW, molecular weight; Th, theoretical; AGI, Arabidopsis Genome Initiative.

| No. <sup>a</sup> | Arabidopsis Protein Name.                                     | AGI No.                | MW Exp (kDa) | pI Exp | MW Th (kDa) | pI Th | % Cov. |
|------------------|---------------------------------------------------------------|------------------------|--------------|--------|-------------|-------|--------|
| 66 <sup>b</sup>  | Jasmonate inducible protein-like                              | At1g52110              | 62.82        | 6.33   | 62.00       | 6.00  | 12%    |
| 67 <sup>b</sup>  | Glycosyl hydrolase family 1 protein                           | At3g09260              | 63.25        | 6.47   | 60.26       | 6.91  | 46%    |
| 68 <sup>b</sup>  | Glycosyl hydrolase family 1 protein                           | At3g09260              | 63.47        | 6.56   | 60.26       | 6.45  | 27%    |
| 69 <sup>b</sup>  | 12S seed storage protein [Precursor]                          | At1g03880              | 43.67        | 6.29   | 48.03       | 6.56  | 18%    |
| 70 <sup>b</sup>  | 12S seed storage protein [Precursor]                          | At5g44120              | 49.43        | 7.19   | 52.59       | 7.68  | 22%    |
| 71 <sup>b</sup>  | 12S seed storage protein [Precursor]                          | At5g44120              | 50.44        | 7.67   | 52.59       | 7.68  | 34%    |
| 78 <sup>b</sup>  | 12S seed storage protein [Precursor]                          | At5g44120              | 27.26        | 6.61   | 52.59       | 7.68  | 13%    |
| 80 <sup>b</sup>  | Alpha-cruciferin 12S (Seed storage protein fragment)          | At4g28520              | 32.64        | 5.85   | 34.68       | 6.42  | 33%    |
| 83 <sup>b</sup>  | Alpha-cruciferin 12S (Seed storage protein fragment)          | At4g28520              | 34.35        | 6.42   | 34.68       | 6.42  | 33%    |
| 84 <sup>b</sup>  | Alpha-cruciferin 12S (Seed storage protein fragment)          | At5g44120              | 30.46        | 6.61   | 31.75       | 6.49  | 42%    |
| 85 <sup>b</sup>  | Alpha-cruciferin 12S (Seed storage protein fragment)          | At1g03880              | 27.20        | 6.50   | 27.24       | 6.34  | 32%    |
| 87 <sup>b</sup>  | Beta-cruciferin 12S (seed storage protein precursor fragment) | At1g03880              | 18.43        | 6.36   | 20.80       | 7.03  | 33%    |
| 88 <sup>b</sup>  | Beta-cruciferin 12S (seed storage protein precursor fragment) | At4g28520              | 22.82        | 8.68   | 21.20       | 6.19  | 44%    |
| 91 <sup>b</sup>  | Late embryogenesis abundant (LEA)                             | At3g53040              | 61.88        | 5.06   | 52.08       | 5.29  | 17%    |
| 92 <sup>b</sup>  | Jasmonate inducible protein-like                              | At2g33070              | 53.10        | 5.59   | 51.61       | 5.58  | 22%    |
| 93 <sup>b</sup>  | Actin 7                                                       | At5g09810              | 42.55        | 5.27   | 41.96       | 5.26  | 19%    |
| 97 <sup>b</sup>  | Alpha-cruciferin 12S (Seed storage protein fragment)          | At5g44120              | 28.89        | 7.90   | 31.75       | 6.49  | 40%    |
| 99 <sup>b</sup>  | Major latex protein                                           | At1g14950              | 13.32        | 6.28   | 18.06       | 6.88  | 27%    |
| 101 <sup>b</sup> | Hydrolase. alpha/beta fold family protein                     | At3g54240              | 41.07        | 5.16   | 39.46       | 9.27  | 19%    |
| 102 <sup>b</sup> | Late embryogenesis abundant (LEA)                             | At2g36640              | 60.51        | 5.22   | 48.49       | 5.43  | 16%    |
| 103 <sup>b</sup> | Enolase                                                       | At2g36530              | 57.95        | 5.58   | 47.72       | 5.54  | 16%    |
| 104 <sup>b</sup> | ATP synthase beta-chain (mitochondrial)                       | At5g08670              | 58.87        | 5.48   | 54.13       | 5.13  | 24%    |
| 105 <sup>b</sup> | Elongation factor 1-gamma 2                                   | At1g57720              | 48.63        | 5.61   | 46.40       | 5.55  | 41%    |
| 106 <sup>b</sup> | Alcohol dehydrogenase                                         | At1g77120              | 41.64        | 5.77   | 41.84       | 6.11  | 22%    |
| 107 <sup>b</sup> | Glutamine synthase                                            | At3g17820              | 40.94        | 5.79   | 38.59       | 5.72  | 21%    |
| 110 <sup>b</sup> | 12S seed storage protein [Precursor]                          | At4g28520              | 57.97        | 6.40   | 55.86       | 6.36  | 19%    |
| 112 <sup>b</sup> | Short-chain dehydrogenase/reductase (SDR) family protein      | At5g50600 or At5g50700 | 40.31        | 5.88   | 39.07       | 6.15  | 21%    |
| 113 <sup>b</sup> | Fructose bisphosphate aldolase-like protein                   | At3g52930              | 40.36        | 5.90   | 38.52       | 6.41  | 31%    |
| 114 <sup>b</sup> | Malate dehydrogenase cytoplasmic 1                            | At1g04410              | 39.56        | 5.87   | 35.57       | 6.11  | 21%    |
| 116 <sup>b</sup> | Expressed protein                                             | At5g45690              | 31.06        | 5.60   | 28.78       | 5.92  | 40%    |
| 121 <sup>b</sup> | Phosphoglycerate kinase cytosolic                             | At1g79550              | 40.92        | 5.45   | 42.19       | 5.43  | 10%    |
| 127 <sup>b</sup> | Elongation factor EF-2                                        | At1g56070              | 93.92        | 5.89   | 94.25       | 5.89  | 24%    |
| 128 <sup>b</sup> | Elongation factor 1-beta-gamma                                | At1g09640              | 47.45        | 5.45   | 46.64       | 5.13  | 26%    |

## Supplemental Table S1 (continued)

Arabidopsis proteins whose *de novo* synthesis occurs during germination *sensu stricto* (1-d post-imbibition) of non-deteriorated control seeds (Od). % Cov, coverage; Exp, experimental; MW, molecular weight; Th, theoretical; AGI, Arabidopsis Genome Initiative.

| No. <sup>a</sup> | Arabidopsis Protein Name.                            | AGI No.                | MW Exp (kDa) | pI Exp | MW Th (kDa) | PI Th | % Cov. |
|------------------|------------------------------------------------------|------------------------|--------------|--------|-------------|-------|--------|
| 129 <sup>b</sup> | Eukaryotic initiation factor 4A-1                    | At3g13920 or At1g72730 | 47.22        | 5.50   | 46.70       | 5.47  | 28%    |
| 131 <sup>b</sup> | Aldose reductase                                     | At5g01670              | 38.48        | 6.22   | 36.38       | 6.23  | 24%    |
| 136 <sup>b</sup> | Heat shock cognate 70 kDa protein 1                  | At5g02500              | 77.87        | 4.87   | 71.37       | 5.03  | 21%    |
| 137 <sup>b</sup> | HSP 70                                               | At3g12580              | 76.06        | 5.07   | 71.37       | 5.03  | 19%    |
| 138 <sup>b</sup> | HSP 70                                               | At5g09590              | 71.33        | 5.21   | 72.99       | 5.63  | 17%    |
| 144 <sup>b</sup> | Peptidyl-prolyl cis-trans isomerase                  | At4g38740              | 15.87        | 6.82   | 18.60       | 7.83  | 47%    |
| 146 <sup>b</sup> | Mercaptopyruvate sulfurtransferase                   | At1g79230              | 37.85        | 5.04   | 41.88       | 6.35  | 35%    |
| 148 <sup>b</sup> | Mitochondrial chaperonin                             | At2g33210              | 65.31        | 5.37   | 61.96       | 6.59  | 33%    |
| 149 <sup>b</sup> | Mitochondrial chaperonin                             | At3g23990              | 64.96        | 5.18   | 61.26       | 5.41  | 25%    |
| 154 <sup>b</sup> | Cupin family protein Alpha subunit                   | At4g36700              | 26.35        | 4.79   | 30.21       | 7.53  | 5%     |
| 155 <sup>b</sup> | Cupin family protein Alpha subunit                   | At4g36700              | 26.35        | 4.79   | 59.07       | 5.21  | 17%    |
| 159 <sup>b</sup> | Alpha-cruciferin 12S (Seed storage protein fragment) | At4g28520              | 23.54        | 5.33   | 27.24       | 6.34  | 15%    |
| 164 <sup>b</sup> | Aspartic proteinase (Precursor)                      | At1g62290              | 35.03        | 5.60   | 35.22       | 5.90  | 8%     |
| 167 <sup>b</sup> | Malate synthase                                      | At5g03860              | 62.96        | 8.00   | 63.87       | 8.04  | 29%    |
| 168 <sup>b</sup> | Malate synthase                                      | At5g03860              | 62.91        | 7.08   | 63.87       | 8.04  | 13%    |
| 171 <sup>b</sup> | Transketolase                                        | At3g60750              | 80.53        | 5.37   | 79.95       | 6.32  | 12%    |
| 173 <sup>b</sup> | Phosphoglycerate kinase                              | At3g12780              | 42.52        | 5.05   | 50.09       | 6.11  | 7%     |
| 174 <sup>b</sup> | O-acetylserine-thiol-lyase                           | At4g14880              | 38.71        | 5.73   | 33.79       | 5.95  | 9%     |
| 176 <sup>b</sup> | Glyceraldehyde-3-phosphate dehydrogenase. cytosolic  | At3g04120              | 39.27        | 6.33   | 36.99       | 6.34  | 13%    |
| 181 <sup>b</sup> | Jasmonate inducible protein-like                     | At2g33070              | 54.36        | 5.52   | 51.61       | 5.58  | 27%    |
| 182 <sup>b</sup> | DEAD box RNA helicase RH15                           | At5g11200              | 49.11        | 5.53   | 48.32       | 5.37  | 32%    |
| 184 <sup>b</sup> | Replication factor A                                 | At5g08020              | 55.12        | 5.37   | 67.27       | 6.41  | 26%    |
| 185 <sup>b</sup> | Glutamine synthase                                   | At3g17820              | 41.02        | 5.59   | 38.59       | 5.72  | 54%    |
| 186 <sup>b</sup> | DNA topoisomerase I                                  | At5g55300              | 96.47        | 5.78   | 102.78      | 10.05 | 8%     |
| 187 <sup>b</sup> | DNA topoisomerase I                                  | At5g55300              | 96.47        | 5.81   | 102.78      | 10.05 | 8%     |
| 188 <sup>b</sup> | Aconitate hydratase cytoplasmic                      | At4g35830              | 96.69        | 5.83   | 98.13       | 6.36  | 10%    |
| 190 <sup>b</sup> | Heat shock protein 101                               | At1g74310              | 101.62       | 5.82   | 101.27      | 5.99  | 16%    |
| 191 <sup>b</sup> | Mitochondrial processing peptidase (MBP)             | At3g02090              | 72.99        | 5.79   | 59.14       | 6.76  | 16%    |
| 192 <sup>b</sup> | ATP synthase alpha-chain (mitochondrial)             | AtMg01190              | 60.54        | 5.92   | 55.05       | 6.54  | 19%    |
| 196 <sup>b</sup> | Aspartate aminotransferase (cytoplasmic isozyme 1)   | At5g19550              | 41.46        | 6.57   | 44.31       | 6.80  | 28%    |
| 197 <sup>b</sup> | Fructose-bisphosphate Aldolase                       | At2g36460              | 40.91        | 6.77   | 38.37       | 7.46  | 23%    |
| 198 <sup>b</sup> | Fructose-bisphosphate Aldolase                       | At2g36460              | 40.72        | 6.89   | 38.37       | 7.46  | 41%    |
| 200 <sup>b</sup> | Thioredoxin family protein                           | At2g47470              | 40.38        | 5.73   | 39.48       | 5.85  | 20%    |
| 201 <sup>b</sup> | Vacuolar ATP synthase catalytic subunit A            | At1g78900              | 68.75        | 5.20   | 68.79       | 4.86  | 26%    |
| 202 <sup>b</sup> | MutT/nudix family protein                            | At1g79690              | 82.15        | 5.20   | 86.84       | 5.09  | 18%    |

## Supplemental Table S1 (continued)

Arabidopsis proteins whose *de novo* synthesis occurs during germination *sensu stricto* (1-d post-imbibition) of non-deteriorated control seeds (Od). % Cov, coverage; Exp, experimental; MW, molecular weight; Th, theoretical; AGI, Arabidopsis Genome Initiative.

| No. <sup>a</sup> | Arabidopsis Protein Name.                                                    | AGI No.   | MW Exp (kDa) | pI Exp | MW Th (kDa) | PI Th | % Cov. |
|------------------|------------------------------------------------------------------------------|-----------|--------------|--------|-------------|-------|--------|
| 206 <sup>b</sup> | 5-methyl-tetra-hydropteroyl-tri-glutamate-homocysteine methyltransferase     | At5g17920 | 82.05        | 6.09   | 84.34       | 6.47  | 17%    |
| 209 <sup>b</sup> | Glycosyl hydrolase family 35 protein                                         | At4g36360 | 65.24        | 6.02   | 95.18       | 7.23  | 8%     |
| 210 <sup>b</sup> | Low-temperature-induced 65 kDa protein or Desiccation-responsive protein 29B | At5g52300 | 88.93        | 4.93   | 65.95       | 4.81  | 20%    |
| 212 <sup>c</sup> | Actin 2                                                                      | At3g18780 | 42.57        | 5.18   | 41.21       | 5.43  | 33%    |
| 215 <sup>c</sup> | RuBisCO subunit binding-protein alpha subunit. chloroplast [Precursor]       | At2g28000 | 64.96        | 4.90   | 62.05       | 4.81  | 19%    |
| 235 <sup>b</sup> | Ubiquitin protein ligase                                                     | At5g02240 | 32.51        | 5.81   | 41.60       | 6.05  | 38%    |
| 241 <sup>b</sup> | Alpha-cruciferin 12S (Seed storage protein fragment)                         | At4g28520 | 34.11        | 5.87   | 34.68       | 6.42  | 32%    |
| 242 <sup>c</sup> | Dormancy related protein                                                     | At1g54870 | 32.62        | 5.76   | 31.37       | 6.11  | 43%    |
| 245 <sup>b</sup> | 12S seed storage protein [Precursor]                                         | At1g03880 | 27.22        | 6.64   | 50.61       | 6.77  | 25%    |
| 246 <sup>b</sup> | Storage proteins 7S                                                          | At3g22640 | 29.45        | 6.70   | 55.04       | 7.14  | 28%    |
| 247 <sup>b</sup> | Storage proteins 7S                                                          | At3g22640 | 34.02        | 6.77   | 55.04       | 7.14  | 18%    |
| 253 <sup>c</sup> | Glyceraldehyde-3-phosphate dehydrogenase. cytosolic                          | At3g04120 | 40.29        | 5.84   | 36.99       | 6.34  | 18%    |
| 254 <sup>b</sup> | Dehydrin                                                                     | At5g66400 | 17.96        | 5.20   | 18.44       | 7.95  | 6%     |
| 255 <sup>b</sup> | Dehydrin                                                                     | At5g66400 | 17.96        | 5.37   | 18.44       | 7.95  | 6%     |
| 259 <sup>b</sup> | Expressed protein                                                            | At1g05510 | 27.01        | 6.10   | 27.28       | 6.70  | 21%    |
| 260 <sup>c</sup> | 1-Cys peroxiredoxin                                                          | At1g48130 | 27.22        | 6.22   | 24.06       | 6.60  | 39%    |
| 265 <sup>b</sup> | Superoxide dismutase (Mn)                                                    | At3g56350 | 24.37        | 6.10   | 26.87       | 6.76  | 54%    |
| 269 <sup>c</sup> | 40S ribosomal protein SA (RPSaA)                                             | At1g72370 | 38.55        | 5.02   | 32.28       | 5.13  | 25%    |
| 271 <sup>c</sup> | 12S seed storage protein [Precursor]                                         | At4g28520 | 59.96        | 6.52   | 55.86       | 6.36  | 9%     |
| 281 <sup>c</sup> | Ferritin 3. chloroplast [Precursor]                                          | At3g11050 | 26.37        | 5.21   | 28.36       | 5.61  | 15%    |
| 284 <sup>c</sup> | GSH-dependent DEHYDROASCORBATE reductase                                     | At1g19570 | 25.34        | 5.43   | 23.62       | 5.79  | 57%    |
| 285 <sup>c</sup> | Glutathione S-transferase                                                    | At1g78370 | 25.34        | 5.60   | 25.65       | 5.80  | 24%    |
| 287 <sup>c</sup> | Beta-cruciferin 12S (seed storage protein precursor fragment)                | At5g44120 | 23.44        | 5.58   | 20.84       | 9.06  | 22%    |
| 290 <sup>b</sup> | Aconitate hydratase cytoplasmic                                              | At4g35830 | 96.69        | 5.88   | 98.13       | 6.36  | 7%     |
| 291 <sup>c</sup> | Subtilase family protein                                                     | At4g20850 | 151.97       | 5.30   | 152.35      | 5.93  | 9%     |
| 293 <sup>c</sup> | Peptidase M1 family protein.                                                 | At1g63770 | 96.69        | 5.61   | 103.40      | 6.09  | 4%     |
| 294 <sup>c</sup> | Peptidase M1 family protein.                                                 | At1g63770 | 96.65        | 5.54   | 103.40      | 6.09  | 9%     |
| 295 <sup>b</sup> | Peptidase M1 family protein.                                                 | At1g63770 | 96.42        | 5.43   | 103.40      | 6.09  | 5%     |
| 296 <sup>b</sup> | Pyruvate.orthophosphate dikinase                                             | At4g15530 | 96.35        | 5.37   | 98.22       | 5.53  | 9%     |
| 297 <sup>b</sup> | Cell division cycle protein (CDC48)                                          | At3g09840 | 97.41        | 5.20   | 89.38       | 4.88  | 35%    |
| 298 <sup>c</sup> | Low-temperature-induced 65 kDa protein or Desiccation-responsive protein 29B | At5g52300 | 92.73        | 4.96   | 65.95       | 4.81  | 18%    |
| 299 <sup>c</sup> | Low-temperature-induced 65 kDa protein or Desiccation-responsive protein 29B | At5g52300 | 93.01        | 4.94   | 65.95       | 4.81  | 16%    |

## Supplemental Table S1 (continued)

Arabidopsis proteins whose *de novo* synthesis occurs during germination *sensu stricto* (1-d post-imbibition) of non-deteriorated control seeds (Od). % Cov, coverage; Exp, experimental; MW, molecular weight; Th, theoretical; AGI, Arabidopsis Genome Initiative.

| No. <sup>a</sup> | Arabidopsis Protein Name.                                              | AGI No.                | MW Exp (kDa) | pI Exp | MW Th (kDa) | pI Th | % Cov. |
|------------------|------------------------------------------------------------------------|------------------------|--------------|--------|-------------|-------|--------|
| 302 <sup>c</sup> | Glyceraldehyde-3-phosphate dehydrogenase. cytosolic                    | At1g13440              | 40.34        | 6.03   | 36.90       | 7.21  | 30%    |
| 305 <sup>c</sup> | Phosphoglucosyltransferase. cytoplasmic 2                              | At1g70730              | 68.25        | 5.70   | 63.46       | 5.57  | 34%    |
| 314 <sup>c</sup> | 60S acidic ribosomal protein P0-C                                      | At3g11250              | 37.54        | 5.22   | 34.37       | 4.78  | 7%     |
| 320 <sup>b</sup> | Ribulose biphosphate carboxylase large chain [Precursor] or rubisco    | AtCg00490              | 57.36        | 5.82   | 53.47       | 6.25  | 24%    |
| 321 <sup>b</sup> | Ribulose biphosphate carboxylase large chain [Precursor] or rubisco    | AtCg00490              | 57.36        | 5.84   | 53.47       | 6.25  | 28%    |
| 323 <sup>c</sup> | protein disulfide isomerase                                            | At1g77510              | 64.95        | 4.81   | 56.35       | 4.64  | 47%    |
| 328 <sup>c</sup> | Hydroxymethyltransferase                                               | At4g13930              | 56.99        | 6.47   | 51.70       | 7.26  | 19%    |
| 335 <sup>c</sup> | Quinone oxidoreductase                                                 | At5g61510              | 39.25        | 6.51   | 44.00       | 8.56  | 16%    |
| 336 <sup>c</sup> | Cinnamyl-alcohol dehydrogenase                                         | At1g72680              | 39.27        | 6.57   | 38.65       | 6.67  | 26%    |
| 358 <sup>c</sup> | Pyruvate decarboxylase                                                 | At5g54960              | 60.53        | 5.77   | 65.78       | 5.63  | 5%     |
| 359 <sup>c</sup> | S-adenosyl-L-homocysteine hydrolase                                    | At4g13940              | 56.90        | 5.57   | 53.36       | 5.83  | 13%    |
| 360 <sup>c</sup> | Glycosyl hydrolase family 3 protein                                    | At5g64570              | 64.96        | 5.75   | 84.29       | 7.71  | 14%    |
| 361 <sup>b</sup> | 4-methyl-5(b-hydroxyethyl)-thiazole monophosphate biosynthesis protein | At3g14990              | 47.75        | 5.22   | 41.84       | 5.08  | 6%     |
| 364 <sup>c</sup> | T-complex protein 1. theta subunit (TCP-1-Theta)                       | At3g03960              | 65.22        | 5.56   | 58.92       | 5.01  | 2%     |
| 365 <sup>b</sup> | Isocitrate lyase                                                       | At3g21720              | 62.77        | 6.30   | 50.42       | 6.29  | 16%    |
| 370 <sup>c</sup> | Glutamate dehydrogenase                                                | At5g18170 or At3g03910 | 41.66        | 6.50   | 44.51       | 6.02  | 13%    |
| 371 <sup>c</sup> | Aspartate aminotransferase. chloroplast                                | At4g31990              | 42.92        | 6.42   | 49.81       | 8.39  | 34%    |
| 374 <sup>c</sup> | Glycyl-tRNA synthetase / glycine--tRNA ligase                          | At1g29880              | 80.51        | 5.91   | 81.93       | 6.59  | 19%    |
| 376 <sup>c</sup> | Tubulin beta-8 chain                                                   | At5g23860              | 57.35        | 4.92   | 50.59       | 4.46  | 9%     |
| 378 <sup>c</sup> | Subtilisin-like serine proteinase. putative. 3' partial                | At3g14067              | 80.28        | 5.77   | 81.80       | 6.76  | 19%    |
| 380 <sup>c</sup> | Nucleoside diphosphate kinase II. chloroplast                          | At5g63310              | 26.31        | 5.89   | 25.53       | 9.30  | 12%    |
| 392 <sup>c</sup> | Alpha-cruciferin 12S (Seed storage protein fragment)                   | At5g44120              | 13.31        | 5.89   | 31.75       | 6.49  | 14%    |
| 393 <sup>c</sup> | Major latex protein                                                    | At1g14950              | 11.85        | 5.89   | 18.06       | 6.37  | 44%    |
| 421 <sup>c</sup> | Late embryogenesis abundant (LEA)                                      | At3g17520              | 34.93        | 5.07   | 29.55       | 5.21  | 55%    |
| 422 <sup>c</sup> | Thioredoxin family protein                                             | At3g16110              | 61.85        | 4.89   | 59.55       | 4.66  | 8%     |
| 425 <sup>c</sup> | Eukaryotic translation initiation factor 3                             | At5g25780 or At5g27640 | 92.72        | 5.16   | 82.16       | 4.87  | 6%     |
| 426 <sup>c</sup> | NAD-dependent epimerase/dehydratase family protein                     | At5g28840              | 43.25        | 5.77   | 42.74       | 6.15  | 54%    |
| 427 <sup>c</sup> | 10-formyltetrahydrofolate synthetase                                   | At1g50480              | 76.41        | 6.22   | 67.78       | 6.70  | 19%    |
| 438 <sup>b</sup> | 20S proteasome alpha subunit B (PAB1) (PRC3)                           | At1g16470              | 27.21        | 5.49   | 25.68       | 5.39  | 8%     |
| 445 <sup>b</sup> | Protein phosphatase 2C                                                 | At3g15260              | 31.89        | 5.36   | 31.61       | 5.61  | 23%    |
| 450 <sup>b</sup> | Monodehydroascorbate reductase                                         | At1g63940              | 52.13        | 5.77   | 52.48       | 7.53  | 26%    |
| 455 <sup>b</sup> | 4-methyl-5(b-hydroxyethyl)-thiazole monophosphate biosynthesis protein | At3g14990              | 42.53        | 5.26   | 41.84       | 5.08  | 11%    |

## Supplemental Table S1 (continued)

Arabidopsis proteins whose *de novo* synthesis occurs during germination *sensu stricto* (1-d post-imbibition) of non-deteriorated control seeds (Od). % Cov, coverage; Exp, experimental; MW, molecular weight; Th, theoretical; AGI, Arabidopsis Genome Initiative.

| No. <sup>a</sup> | Arabidopsis Protein Name.                                                                               | AGI No.                                          | MW Exp (kDa) | pI Exp | MW Th (kDa)    | pI Th        | % Cov.    |
|------------------|---------------------------------------------------------------------------------------------------------|--------------------------------------------------|--------------|--------|----------------|--------------|-----------|
| 458 <sup>c</sup> | Xylose isomerase                                                                                        | At5g57655                                        | 55.89        | 5.58   | 32.39          | 7.89         | 12%       |
| 459 <sup>c</sup> | Strictosidine synthase-related                                                                          | At3g57020                                        | 41.41        | 6.57   | 41.43          | 6.57         | 7%        |
| 508 <sup>c</sup> | Elongation factor 1B alpha-subunit 2                                                                    | At5g19510                                        | 34.04        | 3.99   | 24.18          | 4.17         | 29%       |
| 509 <sup>b</sup> | Nascent Polypeptide-associated Complex (NAC) domain-containing protein                                  | At5g13850                                        | 34.11        | 4.01   | 17.87          | 4.85         | 24%       |
| 510 <sup>b</sup> | 20S proteasome alpha subunit E2 (PAE2)                                                                  | At3g14290 or At1g53850                           | 25.98        | 4.00   | 25.96          | 4.41         | 9%        |
| 525 <sup>c</sup> | Actin                                                                                                   | At5g59370 or At5g09810 or At3g53750 or At3g46520 | 34.08        | 4.81   | 41.78          | 5.29         | 8%        |
| 543 <sup>c</sup> | D-fructose-1.6-bisphosphate 1-phosphohydrolase                                                          | At1g43670                                        | 40.92        | 5.29   | 37.26          | 5.28         | 25%       |
| 544 <sup>c</sup> | Methyl-CpG-binding domain-containing protein                                                            | At1g15340                                        | 65.27        | 3.50   | 42.34          | 4.34         | 8%        |
| 546 <sup>c</sup> | Stress-inducible protein                                                                                | At1g62740 or At1g12270 or At4g12400              | 71.33        | 6.00   | 64.50          | 6.05         | 16%       |
| 548 <sup>c</sup> | Phosphoglycerate kinase                                                                                 | At1g79550                                        | 40.94        | 5.56   | 42.13          | 5.34         | 64%       |
| 551 <sup>c</sup> | HSP 90                                                                                                  | At2g04030                                        | 91.66        | 4.00   | 88.65          | 4.65         | 5%        |
| 552 <sup>c</sup> | Shepherd protein (SHD)                                                                                  | At4g24190                                        | 96.35        | 4.58   | 94.19          | 4.66         | 17%       |
| 554 <sup>c</sup> | Heat shock protein 17.6A                                                                                | At5g12030                                        | 17.93        | 5.51   | 17.68          | 5.59         | 22%       |
| 556 <sup>c</sup> | Acetyl-CoA C-acyltransferase                                                                            | At2g33150                                        | 44.48        | 8.60   | 48.56          | 8.47         | 38%       |
| 557 <sup>c</sup> | 26S proteasome regulatory subunit S5A (RPN10). identical to multiubiquitin chain binding protein (MBP1) | At4g38630                                        | 56.46        | 4.00   | 40.74          | 4.22         | 7%        |
| 561 <sup>c</sup> | Succinyl-CoA ligase (GDP-forming) alpha-chain. mitochondrial                                            | At5g08300                                        | 39.27        | 6.59   | 36.15          | 8.39         | 9%        |
| 562 <sup>c</sup> | Translation elongation factor EF-Tu precursor. mitochondrial                                            | At4g02930                                        | 42.94        | 5.85   | 49.41          | 6.68         | 45%       |
| 564 <sup>c</sup> | Cucumis-like serine protease (ARA12)                                                                    | At5g67360                                        | 87.84        | 6.40   | 79.28          | 5.91         | 14%       |
| 570 <sup>c</sup> | AMP-dependent synthetase or ligase family or GMP synthase                                               | At3g48990 or At1g63660                           | 60.53        | 5.96   | 55.60 or 59.20 | 6.08 or 6.01 | 17% or 6% |
| 571 <sup>c</sup> | Peroxiredoxin type 2                                                                                    | At1g65980                                        | 16.14        | 5.18   | 17.42          | 5.17         | 38%       |
| 575 <sup>c</sup> | 20 kDa chaperonin. chloroplast (CPN21)                                                                  | At5g20720                                        | 25.42        | 5.19   | 26.78          | 9.44         | 41%       |
| 576 <sup>c</sup> | Glutathione S-transferase (2.4-D-inducible)                                                             | At1g78370                                        | 24.01        | 5.18   | 24.99          | 5.48         | 16%       |
| 579 <sup>c</sup> | glycine-rich protein similar to P23 co-chaperone.                                                       | At4g02450                                        | 36.05        | 3.98   | 25.47          | 4.17         | 24%       |
| 580 <sup>c</sup> | Elongation factor 1B alpha-subunit 2 (eEF1Balpha2)                                                      | At5g19510                                        | 35.06        | 4.02   | 24.20          | 4.17         | 31%       |

## Supplemental Table S1 (continued)

Arabidopsis proteins whose *de novo* synthesis occurs during germination *sensu stricto* (1-d post-imbibition) of non-deteriorated control seeds (0d). % Cov, coverage; Exp, experimental; MW, molecular weight; Th, theoretical; AGI, Arabidopsis Genome Initiative.

| No. <sup>a</sup>  | Arabidopsis Protein Name.                                              | AGI No.                             | MW Exp (kDa) | pI Exp | MW Th (kDa) | pI Th | % Cov. |
|-------------------|------------------------------------------------------------------------|-------------------------------------|--------------|--------|-------------|-------|--------|
| 584 <sup>c</sup>  | Nucleosome assembly protein (NAP) family protein                       | At1g74560 or At1g18800              | 38.32        | 3.19   | 29.46       | 4.18  | 11%    |
| 585 <sup>c</sup>  | 14-3-3 protein GF14 psi (GRF3) (RCI1)                                  | At5g38480                           | 32.64        | 4.80   | 28.59       | 4.75  | 23%    |
| 586 <sup>c</sup>  | Elongation factor 1-alpha                                              | At5g60390                           | 54.96        | 9.00   | 49.48       | 9.64  | 23%    |
| 587 <sup>c</sup>  | Expressed protein                                                      | At5g02240                           | 32.62        | 5.81   | 27.09       | 6.19  | 31%    |
| 588 <sup>c</sup>  | Glucose and ribitol dehydrogenases                                     | At3g05260                           | 34.08        | 5.79   | 31.43       | 6.09  | 62%    |
| 590 <sup>c</sup>  | Cinnamoyl-CoA reductase                                                | At5g58490                           | 38.71        | 5.59   | 35.74       | 5.80  | 30%    |
| 592 <sup>c</sup>  | Ketol-acid reductoisomerase. chloroplast precursor                     | At3g58610                           | 61.88        | 5.61   | 63.80       | 6.36  | 13%    |
| 593 <sup>c</sup>  | T-complex protein 1. beta subunit (TCP-1-beta)                         | At5g20890                           | 61.90        | 5.72   | 57.25       | 5.59  | 22%    |
| 614 <sup>c</sup>  | Aspartyl-tRNA synthetase                                               | At4g31180                           | 68.68        | 5.83   | 62.90       | 6.12  | 26%    |
| 705 <sup>c</sup>  | Beta-cruciferin 12S (seed storage protein precursor fragment)          | At1g03880                           | 11.75        | 8.9    | 21.20       | 6.19  | 44%    |
| 728 <sup>c</sup>  | Phosphoenolpyruvate carboxykinase (ATP)                                | At4g37870                           | 72.97        | 6.44   | 73.36       | 6.61  | 11%    |
| 729 <sup>c</sup>  | S-adenosyl-L-homocysteine hydrolase                                    | At4g13940                           | 59.97        | 5.71   | 53.34       | 5.66  | 18%    |
| 731 <sup>c</sup>  | Cell division cycle protein (CDC48)                                    | At3g09840 or At5g03340 or At3g53230 | 96.47        | 5.09   | 89.33       | 5.13  | 6%     |
| 732 <sup>c</sup>  | Heat shock protein                                                     | At1g79930                           | 101.44       | 5.04   | 91.56       | 5.10  | 4%     |
| 739 <sup>c</sup>  | Alpha-cruciferin 12S (Seed storage protein fragment)                   | At5g44120                           | 31.04        | 5.81   | 31.75       | 6.49  | 47%    |
| 741 <sup>c</sup>  | Succinate-semialdehyde dehydrogenase (SSADH1)                          | At1g79440                           | 59.99        | 5.66   | 56.52       | 6.10  | 8%     |
| 775 <sup>c</sup>  | 6-phosphogluconate dehydrogenase NAD-binding domain-containing protein | At3g25530                           | 31.94        | 5.63   | 30.69       | 5.88  | 23%    |
| 810 <sup>c</sup>  | ATP-dependent Clp protease ATP-binding subunit / ClpC                  | At5g50920                           | 94.01        | 5.59   | 103.45      | 6.36  | 23%    |
| 1137 <sup>c</sup> | TATA box-binding protein-interacting protein                           | At5g22330                           | 59.96        | 5.71   | 50.29       | 5.67  | 17%    |
| 1138 <sup>c</sup> | Expressed protein                                                      | At5g45690                           | 28.06        | 5.80   | 28.76       | 5.92  | 16%    |
| 1151 <sup>c</sup> | Glutathione S-transferase                                              | At2g30870                           | 25.32        | 5.60   | 24.23       | 5.49  | 18%    |
| 1153 <sup>c</sup> | Beta-cruciferin 12S (seed storage protein precursor fragment)          | At4g28520                           | 11.51        | 9.02   | 21.20       | 6.19  | 39%    |
| 1154 <sup>c</sup> | Alpha-cruciferin 12S (Seed storage protein fragment)                   | At5g44120                           | 11.78        | 9.05   | 31.75       | 6.49  | 5%     |
| 1155 <sup>c</sup> | Alpha/beta-cruciferin 12S (Seed storage protein fragment)              | At5g44120                           | 10.43        | 9.02   | 31.64       | 9.80  | 17%    |
| 1156 <sup>c</sup> | Beta-cruciferin 12S (seed storage protein precursor fragment)          | At5g44120                           | 10.68        | 9.05   | 20.84       | 9.06  | 41%    |

<sup>a</sup>Protein numbering following Arabidopsis seed protein reference maps available on this web site: <http://www.seed-proteome.com>; <sup>b</sup>Listed proteins correspond to previously identified proteins (Gallardo et al., 2001, 2002a; Rajjou et al., 2004, 2006a; Job et al., 2005); <sup>c</sup>Listed proteins correspond to proteins identified during this work; the peptide sequences determined are available in Supplemental Table S2.

## Supplemental Table S2

Peptide sequences identified by MS-MS sequencing and corresponding to novel proteins in Arabidopsis seeds identified in this work. % Cov, coverage; AGI, Arabidopsis Genome Initiative.

| No. <sup>a</sup> | Arabidopsis Protein Name.                                              | AGI No.   | % Cov. | Identified peptides by mass spectrometry                                                                                                                                                                                                                                             |
|------------------|------------------------------------------------------------------------|-----------|--------|--------------------------------------------------------------------------------------------------------------------------------------------------------------------------------------------------------------------------------------------------------------------------------------|
| 212              | Actin 2                                                                | At3g18780 | 33%    | R.AVFPSVVGPR.H<br>K.IWHHTFYNELR.I<br>R.IAPEEHPVLLTEAPLNPK.A<br>R.TTGIVLDSGDGVSHTVPIYEGFSLPHAILR.L<br>K.TSSSIEKNYELPDGQVITIGAER.F<br>K.NYELPDGQVITIGAER.F<br>K.DLYGNIVLSGGTTMFSGIADR.M Oxidation (M)<br>K.AEYDEAGPGIVHR.K                                                             |
| 215              | RuBisCO subunit binding-protein alpha subunit. chloroplast [Precursor] | At2g28000 | 19%    | K.LADCVGLTLGPR.G<br>R.NVVLDEFGSPK.V<br>R.AIELPNAMENAGAALIR.E<br>K.HGLLSVTSGANPVSLKR.G<br>R.GYISPQFVTNPEK.L<br>K.LLAEFENAR.V<br>K.DSTTLIADAASKDELQAR.I<br>K.ELFETDSVYDSEK.L<br>K.ELFETDSVYDSEKLAER.I                                                                                  |
| 242              | Dormancy related protein                                               | At1g54870 | 43%    | K.QHAQPGKEHVMESPQFSSSDYQPSNK.L Oxidation (M)<br>R.GKVALITGGDSGIGR.A<br>K.VALITGGDSGIGR.A<br>K.TSDSKEPIAIPDLGFDENCKR.V Carbamidomethyl (C)<br>R.VVDEVVNAFGR.I<br>R.IDVLINNAAEQYESSTIEEIDEPR.L<br>R.IDVLINNAAEQYESSTIEEIDEPRLER.V<br>R.TNIFSYFFLTR.H<br>K.IKNFGSEVPMKR.A Oxidation (M) |
| 253              | Glyceraldehyde-3-phosphate dehydrogenase. cytosolic                    | At3g04120 | 18%    | K.YDSVHGQWK.H<br>K.TLLFGEKPVTVFGIR.N<br>K.KVVISAPSK.D<br>R.AASFNIIPSTGAAK.A<br>K.VLPALNGK.L<br>K.AGIALSDK.F                                                                                                                                                                          |
| 260              | 1-Cys peroxiredoxin                                                    | At1g48130 | 39%    | K.LLGLSCDDVQSHKDWIK.D<br>K.VNYPIADPNKEIIPQLNMIDPIENGPSR.A<br>K.EIIPQLNMIDPIENGPSR.A<br>K.IKLSFLYPSTTGR.N<br>K.LSFLYPSTTGR.N<br>K.IATPVNWKPDQPVVISPAVSDEEAK.K<br>K.IATPVNWKPDQPVVISPAVSDEEAKK.M                                                                                       |
| 269              | 40S ribosomal protein SA (RPSaA)                                       | At1g72370 | 25%    | R.NDGIYIFNLGK.T<br>K.FAQYTGANAIAGR.H<br>R.LLILTDPR.T<br>K.EGALGNIPIIAFCDTDSMPR.F<br>R.FVDIGIPANNK.G<br>R.FVDIGIPANNKKGK.H                                                                                                                                                            |
| 271              | 12S seed storage protein [Precursor]                                   | At4g28520 | 9%     | K.ISYVVQGTGISGR.V<br>R.VKGPFQVVRPPLR.Q<br>K.GPFQVVRPPLR.Q<br>R.QPYESEEWHRPR.S<br>K.IKFNLTLETTLTR.A                                                                                                                                                                                   |



## Supplemental Table S2 (continued)

Peptide sequences identified by MS-MS sequencing and corresponding to novel proteins in Arabidopsis seeds identified in this work. % Cov, coverage; AGI, Arabidopsis Genome Initiative.

| No. <sup>a</sup> | Arabidopsis Protein Name.                                     | AGI No.   | % Cov. | Identified peptides by mass spectrometry                                                                                                                                                                                                                                                 |
|------------------|---------------------------------------------------------------|-----------|--------|------------------------------------------------------------------------------------------------------------------------------------------------------------------------------------------------------------------------------------------------------------------------------------------|
| 281              | Ferritin 3. chloroplast [Precursor]                           | At3g11050 | 15%    | K.FFNDSSLEER.G<br>R.GHAEMFMEYQNK.R.G<br>R.GHAEMFMEYQNK.R.G Oxidation (M)<br>K.ISEYVAQLR.R<br>K.ISEYVAQLRR.I                                                                                                                                                                              |
| 284              | GSH-dependent DEHYDROASCORB ATE reductase                     | At1g19570 | 57%    | K.AAVGAPDHLGDCPFSQ.R.A<br>K.AAVGAPDHLGDCPFSQ.R.A Carbamidomethyl (C)<br>K.IDDKVWVTDSDVIVGILEE.K.Y<br>K.DSNDGSEHALLVELEALENHLK.S<br>K.SHDGPFIAGER.V K.LYHLQVALGHFK.S<br>K.SWSVPESFPVHNYMK.T Oxidation (M)<br>K.TLFSLDSFEK.T<br>K.TLFSLDSFEKTKTEEK.Y<br>K.TEEKYVISGWAPK.V<br>K.YVISGWAPK.V |
| 285              | Glutathione S-transferase                                     | At1g78370 | 24%    | K.DFIEILK.T<br>R.FWADFIDK.K<br>R.FWADFIDKK.L<br>K.NPILSPDPYLR.A<br>K.FANFSIESEVPK.L<br>K.SPLLLQMNPIHK.K<br>K.SPLLLQMNPIHK.K<br>K.SPLLLQMNPIHK.K + Oxidation (M)<br>K.SPLLLQMNPIHK.K + Oxidation (M)<br>K.SPLLLQMNPIHKK.I + Oxidation (M)<br>R.NKSPLLQMNPIHK.K + Oxidation (M)            |
| 287              | Beta-cruciferin 12S (seed storage protein precursor fragment) | At5g44120 | 22%    | K.VIPGCAETFQDSSEFQPR.F Carbamidomethyl (C)<br>R.FEGQQSQ.R.F<br>R.FRDMHQK.V Oxidation (M)<br>K.NIFNGFGPEVIAQALK.I<br>K.IDLQTAQQQLQNQDDNR.G<br>R.VQGPFGVIRPPLR.G<br>R.GQRPQEEEEEEGR.H<br>R.ADVYKPKQLGYISTLNSYDLPILR.F                                                                      |
| 291              | Subtilase family protein                                      | At4g20850 | 9%     | YGTLTVLR<br>SSVLMPGVK + Oxidation (M)<br>LVPIAVLNK<br>SVDVDELAR<br>FVDLVTEAVNK<br>LGSMETGTGLTR + Oxidation (M)<br>SVSERLEQEV.R<br>FVDLVTEAVNKR<br>QSTEWTIQVDPK<br>IRVPYQPIDAQLK<br>LVYQLFTDDLTSR<br>VYAMGDVYPESKLPK + Oxidation (M)                                                      |
| 293              | Peptidase M1 family protein.                                  | At1g63770 | 4%     | K.VYSLIGFGCGSPVNFHAK.D + Carbamidomethyl (C)<br>K.AITLPGEGEIMDMAVADPDAVHAVR.K + 3 Oxidation (M)                                                                                                                                                                                          |
| 294              | Peptidase M1 family protein.                                  | At1g63770 | 9%     | K.SLNIFNSK.L<br>K.TLLGTQGFR.K<br>K.GIDL.YFER.H<br>K.VVSSYNADAR.T<br>R.KGIDL.YFER.H<br>K.IWTPAEDLPK.T<br>K.KLLDHPAFDLR.N<br>K.GSSAALVLDGHDLK.L<br>K.LLKEGDYQLDSR.H                                                                                                                        |

## Supplemental Table S2 (continued)

Peptide sequences identified by MS-MS sequencing and corresponding to novel proteins in Arabidopsis seeds identified in this work. % Cov, coverage; AGI, Arabidopsis Genome Initiative.

| No. <sup>a</sup> | Arabidopsis Protein Name.                                                    | AGI No.   | % Cov. | Identified peptides by mass spectrometry                                                                                                                                                                                                                                                                                                       |
|------------------|------------------------------------------------------------------------------|-----------|--------|------------------------------------------------------------------------------------------------------------------------------------------------------------------------------------------------------------------------------------------------------------------------------------------------------------------------------------------------|
| 298              | Low-temperature-induced 65 kDa protein or Desiccation-responsive protein 29B | At5g52300 | 18%    | K.SLSHAGETNVPASEEIVPPGTK.V<br>R.EAPTHYPLGVSEFSDR.G<br>R.EAPTHYPLGVSEFSDRGESR.E<br>R.EAHQEPLNTPVSLLSATEDVTR.T<br>R.TFAPGGEDDYLGQR.K<br>K.GGEAGVPEIAESLGR.M<br>R.DLPTGTHDQFSPELSRPK.E                                                                                                                                                            |
| 299              | Low-temperature-induced 65 kDa protein or Desiccation-responsive protein 29B | At5g52300 | 16%    | R.EAPTHYPLGVSEFSDR.G<br>R.EAPTHYPLGVSEFSDRGESR.E<br>R.EAHQEPLNTPVSLLSATEDVTR.T<br>R.TFAPGGEDDYLGQR.K R.TFAPGGEDDYLGQRK.V<br>K.RLEEDPAAPGGGSDYLSGVSNYQSK.V<br>K.VTDPHKGGEAGVPEIAESLGR.M<br>K.GGEAGVPEIAESLGR.M                                                                                                                                  |
| 302              | Glyceraldehyde-3-phosphate dehydrogenase. cytosolic                          | At1g13440 | 30%    | K.VKDDKTLFGEKPVTVFGIR.N<br>K.TLLFGEKPVTVFGIR.N<br>K.DAPMFVVGVNEHEYK.S Oxidation (M)<br>R.FGIVEGLMTTVHSITATQK.T Oxidation (M)<br>R.VPTVDVSVVDLTVR.L<br>K.GILGYTEDDVVSTDFVGDNR.S<br>K.LVSWYDNEWGYSSR.V                                                                                                                                           |
| 305              | Phosphoglucomutase. cytoplasmic 2                                            | At1g70730 | 34%    | K.VSLVSTSPIDGQKPGTSGLR.K<br>R.YYSEQAIQIIVK.M<br>R.VWVGQNSLLSTPAVSAIR.E<br>R.VDISTIGITSFEGPEGK.F<br>K.FDVEVFDSADDYVK.L<br>K.FTFCYDALHGVAGAYAHR.I Carbamidomethyl (C)<br>K.EDFGGGHPDPNLTYAK.E<br>K.TDDAGGEPPEFGAAADGDADR.N<br>K.FFEVPTGWK.F<br>K.LVTVEDIVR.Q<br>R.QHWATYGR.H<br>R.HYYTR.Y<br>R.YLFEDGSR.L<br>R.LYIEQYEK.D<br>R.DSQDALGPLVDVALK.L |
| 314              | 60S acidic ribosomal protein P0-C                                            | At3g11250 | 7%     | ~.MVKATKAEK.K<br>K.ATKAEEK.I<br>K.GTVEIITVELIK.Q                                                                                                                                                                                                                                                                                               |

## Supplemental Table S2 (continued)

Peptide sequences identified by MS-MS sequencing and corresponding to novel proteins in Arabidopsis seeds identified in this work. % Cov, coverage; AGI, Arabidopsis Genome Initiative.

| No. <sup>a</sup> | Arabidopsis Protein Name.           | AGI No.   | % Cov. | Identified peptides by mass spectrometry                                                                                                                                                                                                                                                                                                                                                                                                                                        |
|------------------|-------------------------------------|-----------|--------|---------------------------------------------------------------------------------------------------------------------------------------------------------------------------------------------------------------------------------------------------------------------------------------------------------------------------------------------------------------------------------------------------------------------------------------------------------------------------------|
| 323              | protein disulfide isomerase         | At1g77510 | 47%    | IQGFPTLK<br>FFESPATK<br>GESVEGPAVR<br>DFNGEALEK<br>NVVAVGVFPK<br>SVQDYNGPR<br>SADSATEVVGEK<br>KTEETAAKDEL<br>EAEGIVTYLKK<br>ADYDFAHTLDAK<br>SQPIPAENNEPVK<br>VVVAESLDDIVFK<br>FLPRGESVEGPAVR<br>LFKPFDELFDVSK<br>LRADYDFAHTLDAK<br>LSGDEFDSFMALAEK + Oxidation (M)<br>LDATANDIPSDFDVK<br>IDASEEANKEFANEYK<br>ESSIPLVTVFSDPNNHPYVAK<br>LFKPFDELFDVSKDFNGEALEK<br>LFKPFDELFDVSKDFNGEALEK<br>SASGNVVVYEGDRTKEDFINFVEK<br>SQPIPAENNEPVKVVVAESLDDIVFK<br>KSQPIPAENNEPVKVVVAESLDDIVFK |
| 328              | Hydroxymethyltransferase            | At4g13930 | 19%    | YSEGIPGNR<br>LLICGGSAYPR<br>LCDLCSITLTK<br>DFEQIGEFSLR<br>NAVFGDSSALAPGGVR<br>ISATSIYFESLPYK<br>GLVEKDFEQIGEFSLR<br>VNFTTGYYIDYDKLEEK<br>YYGGNEFIDEIENLCR                                                                                                                                                                                                                                                                                                                       |
| 335              | Quinone oxidoreductase              | At5g61510 | 16%    | GMTAQFLLR<br>VNHKYPLSR<br>VADAHADLENR<br>VYEHGGPEVLK<br>AIGLNFIDVYFR<br>GVNVVYDSVGKDTFK                                                                                                                                                                                                                                                                                                                                                                                         |
| 336              | Cinnamyl-alcohol dehydrogenase      | At1g72680 | 26%    | R.DPSGLLSPHTITR.R<br>R.NQHGDSKYPLVPGHEIAGIVTK.V<br>R.ECEYCNQEVNCAK.G<br>K.GVFTFNGIDHDGSVTK.G<br>K.GGYSSHIVVHER.Y<br>K.IAGTYVLVGFSEIK.I<br>K.ISPANLNLGMR.M<br>K.ISPANLNLGMR.M Oxidation (M)<br>K.IYPNIEVIQK.I                                                                                                                                                                                                                                                                    |
| 358              | Pyruvate decarboxylase              | At5g54960 | 5%     | VSAANSRPPNPQ<br>AADAFVELADASGYGLAVMPSAK<br>AADAFVELADASGYGLAVMPSAK + Oxidation (M)                                                                                                                                                                                                                                                                                                                                                                                              |
| 359              | S-adenosyl-L-homocysteine hydrolase | At4g13940 | 13%    | R.TEFGPSQPFKGAR.I<br>K.GETLQEYWWCTER.A Carbamidomethyl (C)<br>K.SKFDNLYGCR.H Carbamidomethyl (C)<br>R.ATDVMIAQKVAVICGYGDVVGK.G<br>K.AGIIVLAEGRL                                                                                                                                                                                                                                                                                                                                 |

## Supplemental Table S2 (continued)

Peptide sequences identified by MS-MS sequencing and corresponding to novel proteins in Arabidopsis seeds identified in this work. % Cov, coverage; AGI, Arabidopsis Genome Initiative.

| No. <sup>a</sup> | Arabidopsis Protein Name.                        | AGI No.                      | % Cov. | Identified peptides by mass spectrometry                                                                                                                                                                                                                              |
|------------------|--------------------------------------------------|------------------------------|--------|-----------------------------------------------------------------------------------------------------------------------------------------------------------------------------------------------------------------------------------------------------------------------|
| 360              | Glycosyl hydrolase family 3 protein              | At5g64570                    | 14%    | R.WGRGQETPGEDPLLASK.Y<br>K.HYTAYDVNDWKGVER.Y<br>R.LGFFDGNPK.N<br>R.LGFFDGNPKNQIYGGLGPTDVCTSANQELAADAAR.Q<br>K.NQIYGGLGPTDVCTSANQELAADAAR.Q<br>K.LAATADVSVLVIGADQSIEAESR.D<br>R.DRVDLHLPQQQELVIQVAK.A<br>R.VDLHLPQQQELVIQVAKAAK.G                                      |
| 364              | T-complex protein 1. theta subunit (TCP-1-Theta) | At3g03960                    | 2%     | K.AQEEIGDGANLTISFAGELLQNAEELIR.M<br>K.AVEILEQLVETGSETMDVR.N Oxidation (M)<br>K.NPTNFNVDNVR.V<br>K.LLGGGLHNSCIVR.G Carbamidomethyl (C)<br>K.VIVSGSIGEMALHFCER.Y Carbamidomethyl (C); Oxidation (M)<br>R.GSTDSILDDLERA VDDGVNTYK.A<br>R.IVPGAAATEIELAQR.L               |
| 370              | Glutamate dehydrogenase 1 or 3                   | At5g18170<br>ou<br>At3g03910 | 13%    | K.VECTIPKDDGTLASVGFGR.V Carbamidomethyl (C)<br>K.GGIGCDPSKLSISELER.L Carbamidomethyl (C)<br>K.FIIEAANHPTDPDADEILSK.K<br>K.FIIEAANHPTDPDADEILSKK.G                                                                                                                     |
| 371              | Aspartate aminotransferase. chloroplast          | At4g31990                    | 34%    | K.DKCLKLGTASNPFLK.A<br>K.LNLGVGAYR.T<br>R.TEELQPYVLNVVK.K<br>K.EYLPIEGLAAFNK.A<br>K.ATAELFGAGHPVIK.E<br>R.VATIQLSGTGSLR.L<br>K.VVSSPTWGNHK.N<br>K.VPWSEYR.Y<br>K.VPWSEYRYDPK.T<br>K.NHIPFFDVAYQGFASGSLDEDAASVR.L<br>K.NLGLYAER.I<br>R.IARPMYSNPPVHGAR.I Oxidation (M) |
| 374              | Glycyl-tRNA synthetase / glycine--tRNA ligase    | At1g29880                    | 19%    | K.SSSVEAQGNVAVR.A<br>R.KAVVNTLER.R<br>K.AVVNTLER.R<br>R.LFYIPSFK.I<br>K.SNVLSFWR.Q<br>R.EYGITAPDTK.N<br>K.LPFAAAQIGQAFR.N<br>K.GTVNNETLGYFIGR.V<br>K.LVITPVKK.E<br>K.ELGLAFKGNQK.N<br>R.VFTPSVIEPSFGIGR.I<br>K.AGDEQLNLF.R<br>K.EAASVVSSVSEGK.M                       |
| 376              | Tubulin beta-8 chain                             | At5g23860                    | 9%     | K.LAVNLIPFPR.L<br>K.EVDEQMINVQNK.N Oxidation (M)<br>R.VSEQFTAMFR.R<br>R.VSEQFTAMFR.R Oxidation (M)                                                                                                                                                                    |

## Supplemental Table S2 (continued)

Peptide sequences identified by MS-MS sequencing and corresponding to novel proteins in Arabidopsis seeds identified in this work. % Cov, coverage; AGI, Arabidopsis Genome Initiative.

| No. <sup>a</sup> | Arabidopsis Protein Name.                               | AGI No.   | % Cov. | Identified peptides by mass spectrometry                                                                                                                                                                                                                                                                                                                                                                                                 |
|------------------|---------------------------------------------------------|-----------|--------|------------------------------------------------------------------------------------------------------------------------------------------------------------------------------------------------------------------------------------------------------------------------------------------------------------------------------------------------------------------------------------------------------------------------------------------|
| 378              | Subtilisin-like serine proteinase. putative. 3' partial | At3g14067 | 19%    | R.AFYRGYLTQR.N<br>R.LCYPGKLNSSLVEGK.I Carbamidomethyl (C)<br>K.AGDQIRDYIK.T<br>K.AGDQIRDYIKTSDSPTAK.I<br>R.KAHPDWSPAIAIK.S<br>K.AHPDWSPAIAIK.S<br>K.SALVTTAYDVENSGEPIEDLATGK.S<br>K.NVGSNVDVYEVGVK.S<br>K.SVLEYEVTFK.S<br>K.SVVLGGGVGVSVPGHEFGSIEWTDGEHVVK.S                                                                                                                                                                             |
| 380              | Nucleoside diphosphate kinase II. chloroplast           | At5g63310 | 12%    | TALAAFRPQFR.L<br>K.EGELCKWDSALATWLRE.~                                                                                                                                                                                                                                                                                                                                                                                                   |
| 392              | Alpha-cruciferin 12S (Seed storage protein fragment)    | At5g44120 | 14%    | R.IEVWDHHPQLR.C<br>R.CSGVSFAR.Y Carbamidomethyl (C)<br>K.GLYLPSFFNTAK.L<br>K.VIPGCAETFQDSSEFQPR.F Carbamidomethyl (C)<br>R.FEQGQSQR.F                                                                                                                                                                                                                                                                                                    |
| 393              | Major latex protein                                     | At1g14950 | 44%    | K.SWNYTCDGK.Q Carbamidomethyl (C)<br>K.MAVTFR.G<br>R.GLDGHVMEQLK.V<br>R.GLDGHVMEQLK.V Oxidation (M)<br>K.VYDVIFQFVPK.S<br>K.VTMFWEK.R<br>K.RYEDSPEPIK.Y<br>K.FVTSLAADMDDHILK.N<br>K.FVTSLAADMDDHILK.N Oxidation (M)                                                                                                                                                                                                                      |
| 421              | Late embryogenesis abundant (LEA)                       | At3g17520 | 55%    | IGLKHEDNIQPTHTTTTVQDDAWR<br>HEDNIQPTHTTTTVQDDAWR<br>KAEEAVGAAK<br>AGSAYETAK<br>DKASQSYDSAGQVKDDVSHK<br>DKASQSYDSAGQVKDDVSHK<br>ASQSYDSAGQVK<br>QVKDSLSGDENDESWTGWAK<br>IGIKNEDINSPNLGETVSEK<br>NEDINSPNLGETVSEK<br>EKLAETVETAKEK<br>EKLAETVETAKEK<br>LAETVETAK<br>LAETVETAKEK<br>ESYETAKSK<br>SKAETLESK<br>SKAETLESKDK<br>SKAETLESKDKASQSYDSAAR<br>AETLESKDK<br>AETLESKDKASQSYDSAAR<br>AETLESKDKASQSYDSAAR<br>ASQSYDSAAR<br>VKESLTDDDAEL |
| 422              | Thioredoxin family protein                              | At3g16110 | 8%     | LTESNTRV<br>GFENLVFAR<br>TVVAAFNNLNSK<br>YTSYDGPCQAEK + Carbamidomethyl (C)                                                                                                                                                                                                                                                                                                                                                              |

## Supplemental Table S2 (continued)

Peptide sequences identified by MS-MS sequencing and corresponding to novel proteins in Arabidopsis seeds identified in this work. % Cov, coverage; AGI, Arabidopsis Genome Initiative.

| No. <sup>a</sup> | Arabidopsis Protein Name.                          | AGI No.                                          | % Cov. | Identified peptides by mass spectrometry                                                                                                                                                                                                                                                                                                                                                         |
|------------------|----------------------------------------------------|--------------------------------------------------|--------|--------------------------------------------------------------------------------------------------------------------------------------------------------------------------------------------------------------------------------------------------------------------------------------------------------------------------------------------------------------------------------------------------|
| 425              | Eukaryotic translation initiation factor 3         | At5g25780 or At5g27640                           | 6%     | LVDLSPGEEK<br>IIAFAWEPK<br>STYSGFELFR<br>YLVTYHSQEPSNPR                                                                                                                                                                                                                                                                                                                                          |
| 426              | NAD-dependent epimerase/dehydratase family protein | At5g28840                                        | 54%    | LATEELCK + Carbamidomethyl (C)<br>ITYFWIK<br>EKAPAAFCR + Carbamidomethyl (C)<br>GSDVSLYGSSK<br>QLETTNVSLK<br>NSDNNLIKEK<br>EQYWPSLENK<br>VVGTTQAPVQLGSLR<br>HYNKDFGIECR + Carbamidomethyl (C)<br>FHNIYGPFGTWK<br>KLPIHHIPGPEGVR<br>ISITGAGGFIASHIAR<br>FFYASSACIYPEFK + Carbamidomethyl (C)<br>RFFYASSACIYPEFK + Carbamidomethyl (C)<br>ESDAWPAEPQDAYGLEK<br>KAQTSTDRFEMWGDGLQTR + Oxidation (M) |
| 427              | 10-formyltetrahydrofolate synthetase               | At1g50480                                        | 19%    | VMDVNDR + Oxidation (M)<br>ITIGQGPEEK<br>GAVDLGIAVEK<br>RSFSDIMFR<br>IFHETSQSDK<br>KITIGQGPEEK<br>ACQNITQPLR + Carbamidomethyl (C)<br>TQYSFSDASK<br>TSPEELTPEEIKK<br>SYGASGVEYSDQAEK<br>MHGGGPDVVAGRPLDR + Oxidation (M)<br>IFHETSQSDKALFNR                                                                                                                                                      |
| 458              | Xylose isomerase                                   | At5g57655                                        | 12%    | FFEAAVAYK<br>GTGGDPFGAATK<br>NGGIAPGGFNFDK<br>EGYQTLNNTDMGR + Oxidation (M)<br>GTLLEPKPQPTK                                                                                                                                                                                                                                                                                                      |
| 459              | Strictosidine synthase-related                     | At3g57020                                        | 7%     | R.DVFFVAVSGER.S<br>K.VPGYPDNIR.L<br>K.YVSEAYER.D                                                                                                                                                                                                                                                                                                                                                 |
| 508              | Elongation factor 1B alpha-subunit 2               | At5g19510                                        | 29%    | TYISGDQLSVDDVK<br>VYAAVPVKPSDAFPNASK<br>WYESVASQLAK<br>GVEMPGLFWGASK Oxidation (M)<br>GVEMPGLFWGASKLVPVGYGIK<br>LVPVGYGIKK                                                                                                                                                                                                                                                                       |
| 525              | Actin                                              | At5g59370 or At5g09810 or At3g53750 or At3g46520 | 8%     | AGFAGDDAPR<br>GYSFTTTAER<br>AVFPSIVGRPR                                                                                                                                                                                                                                                                                                                                                          |

## Supplemental Table S2 (continued)

Peptide sequences identified by MS-MS sequencing and corresponding to novel proteins in Arabidopsis seeds identified in this work. % Cov, coverage; AGI, Arabidopsis Genome Initiative.

| No. <sup>a</sup> | Arabidopsis Protein Name.                      | AGI No.                                   | % Cov. | Identified peptides by mass spectrometry                                                                                                                                                                                                                                                                                                                                          |
|------------------|------------------------------------------------|-------------------------------------------|--------|-----------------------------------------------------------------------------------------------------------------------------------------------------------------------------------------------------------------------------------------------------------------------------------------------------------------------------------------------------------------------------------|
| 543              | D-fructose-1,6-bisphosphate 1-phosphohydrolase | At1g43670                                 | 25%    | R.FVLNEQSK.Y<br>R.GDFTILLSHIVLGCK.F<br>R.GDFTILLSHIVLGCK.F Carbamidomethyl (C)<br>K.FVCSAVNK.A<br>K.FVCSAVNK.A Carbamidomethyl (C)<br>K.LIGLAGETNIQGEEQK.K<br>K.LIGLAGETNIQGEEQK.K<br>R.YVGSMAVADVHR.T<br>R.YVGSMAVADVHR.T<br>R.YVGSMAVADVHR.T Oxidation (M)<br>R.YVGSMAVADVHR.T Oxidation (M)<br>R.TLLYGGIFLYPADK.K<br>R.SPIFLGSYDDVEEIK.A                                       |
| 544              | Methyl-CpG-binding domain-containing protein   | At1g15340                                 | 8%     | EAQEVVTEADVEK<br>SLEANQVQQQGAASVSC + Carbamidomethyl ©                                                                                                                                                                                                                                                                                                                            |
| 546              | stress-inducible protein                       | At1g62740 or<br>At1g12270 or<br>At4g12400 | 16%    | LGAMPEGLKDAEK + Oxidation (M)<br>DYEPVIQTYQK<br>NPSNLNLYLQDQR<br>QVLSDLQENPAAAQK<br>VSKDYEPVIQTYQK<br>ELEQQEYYDPNIGDEEREK<br>DFETAIQHYSTAMEIDDEDISYITNR + Oxidation (M)                                                                                                                                                                                                           |
| 548              | Phosphoglycerate kinase                        | At1g79550                                 | 64%    | R.SVGTLEADLK.G<br>R.VDLNVPLDDNSNITDDTR.I<br>R.AAVPTIK.Y<br>R.VVLCSHLGRPK.G<br>R.VVLCSHLGRPK.G Carbamidomethyl (C)<br>K.YSLKPLVPR.L<br>K.LVAGLPEGGVLLLENVR.F<br>R.FYAEKNDPEFAK.K<br>K.LAALADVYVNDAFGTAHR.A<br>K.FLKPSVAGFLMQK.E<br>K.FLKPSVAGFLMQK.E Oxidation (M)<br>K.ELDYLVGAVANPK.K<br>K.KPFAAIVGGSK.V<br>K.GVSLLLPTDVVIADK.F<br>K.GVSLLLPTDVVIADKFAPDANSK.I<br>K.TFSEALDTTK.T |
| 551              | HSP 90                                         | At2g04030                                 | 5%     | LSSSPCVLVSGK + Carbamidomethyl (C)<br>GVVDSDDLPLNVS<br>AQUALGDTSSLEFMR + Oxidation (M)                                                                                                                                                                                                                                                                                            |
| 552              | Shepherd protein (SHD)                         | At4g24190                                 | 17%    | SPFLER<br>VLEINPR<br>GNLASENVDDVK<br>LADTPCVVVTSK + Carbamidomethyl (C)<br>IMQSQTLSANK + Oxidation (M)<br>GLVDSDTLPLNVS<br>VFISDEFDELLPK<br>RVFISDEFDELLPK<br>FLALTDKDVLGEGDTAK<br>EVTEEEYTKFYHSLK<br>LHLRDEAGEYLEESKLL<br>LMDIINSLSYNSKDIFLR + Oxidation (M)                                                                                                                     |

## Supplemental Table S2 (continued)

Peptide sequences identified by MS-MS sequencing and corresponding to novel proteins in Arabidopsis seeds identified in this work. % Cov, coverage; AGI, Arabidopsis Genome Initiative.

| No. <sup>a</sup> | Arabidopsis Protein Name.                                                                               | AGI No.   | % Cov. | Identified peptides by mass spectrometry                                                                                                                                                                                                                                                                                                                                                                                                                                                                                                                                                                                                                                                                        |
|------------------|---------------------------------------------------------------------------------------------------------|-----------|--------|-----------------------------------------------------------------------------------------------------------------------------------------------------------------------------------------------------------------------------------------------------------------------------------------------------------------------------------------------------------------------------------------------------------------------------------------------------------------------------------------------------------------------------------------------------------------------------------------------------------------------------------------------------------------------------------------------------------------|
| 554              | Heat shock protein 17.6A                                                                                | At5g12030 | 22%    | R.KFQLPDNADLEK.I<br>R.KFQLPDNADLEKISAACNDGVLK.V<br>R.KFQLPDNADLEKISAACNDGVLK.V Carbamidomethyl (C)<br>K.FQLPDNADLEK.I<br>K.ISAACNDGVLK.V<br>K.ISAACNDGVLK.V Carbamidomethyl (C)<br>K.VTIPKLPPEPK.K                                                                                                                                                                                                                                                                                                                                                                                                                                                                                                              |
| 556              | Acetyl-CoA C-acyltransferase                                                                            | At2g33150 | 38%    | DTYPDDLAPVLR<br>MAAFYAGFPETVAVR + Oxidation (M)<br>FGVSRQEQDQAAVDSHR<br>GNFKDTPDDLAPVLR<br>FGVSRQEQDQAAVDSHRK<br>FGVSRQEQDQAAVDSHRK<br>RGNFKDTPDDLAPVLR<br>DGTITAGNSSQVSDGAGAVLLMKR + Oxidation (M)<br>TFAAVGVDPAIMGIGPAVAIPAIVK + Oxidation (M)<br>KFAQAQNCLLPMGVTSENVAQR + Carbamidomethyl (C);<br>Oxidation (M)<br>ALIEKTNLNPSEVGDIVVGTVLAPGSQR<br>TQSNPENTVGILTMAGK Oxidation (M)<br>VLTTPSTDLGK                                                                                                                                                                                                                                                                                                            |
| 557              | 26S proteasome regulatory subunit S5A (RPN10). identical to multiubiquitin chain binding protein (MBP1) | At4g38630 | 7%     | TQSNPENTVGILTMAGK Oxidation (M)<br>VLTTPSTDLGK                                                                                                                                                                                                                                                                                                                                                                                                                                                                                                                                                                                                                                                                  |
| 561              | Succinyl-CoA ligase (GDP-forming) alpha-chain. mitochondrial                                            | At5g08300 | 9%     | K.KGGTEHLGLPVFNSVAEAK.A<br>K.IGIMPGYIHKPGK.I<br>K.IGIMPGYIHKPGK.I Oxidation (M)                                                                                                                                                                                                                                                                                                                                                                                                                                                                                                                                                                                                                                 |
| 562              | Translation elongation factor EF-Tu precursor. mitochondrial                                            | At4g02930 | 45%    | K.TTLTAAITK.V<br>K.AIAFDEIDKAPEEK.K<br>K.AIAFDEIDKAPEEK.R<br>R.GITIATAHVEYETAK.R<br>R.HYAHVDCPGHADYVK.N<br>R.HYAHVDCPGHADYVK.N Carbamidomethyl (C)<br>K.EHILLAR.Q<br>R.GSALSALQGTNDEIGR.Q<br>K.LMDAVDEYIPDPVR.V<br>K.LMDAVDEYIPDPVR.V Oxidation (M)<br>R.VLDKPFMLPIEDVFSIQGR.G<br>R.VLDKPFMLPIEDVFSIQGR.G Oxidation (M)<br>R.IEQGVK.V<br>R.EGGVPLKSTVTGVEMFK.K<br>R.EGGVPLKSTVTGVEMFK.K Oxidation (M)<br>K.STVTGVEMFK.K<br>K.STVTGVEMFK.K Oxidation (M)<br>K.STVTGVEMFKK.I<br>K.STVTGVEMFKK.I Oxidation (M)<br>K.ILDNGQAGDNGVLLLR.G<br>R.GMVIKPGSCK.T<br>R.GMVIKPGSCK.T Oxidation (M)<br>R.GMVIKPGSCK.T Carbamidomethyl (C)<br>K.KFEAEIYVLTKEGGR.H<br>R.HTAFFSNYRPQFYLR.T<br>R.TADITKVELPENVK.M<br>K.VELPENVK.M |



## Supplemental Table S2 (continued)

Peptide sequences identified by MS-MS sequencing and corresponding to novel proteins in Arabidopsis seeds identified in this work. % Cov, coverage; AGI, Arabidopsis Genome Initiative.

| No. <sup>a</sup> | Arabidopsis Protein Name.                                  | AGI No.                | % Cov.    | Identified peptides by mass spectrometry                                                                                                                                                                                                                                                                |
|------------------|------------------------------------------------------------|------------------------|-----------|---------------------------------------------------------------------------------------------------------------------------------------------------------------------------------------------------------------------------------------------------------------------------------------------------------|
| 564              | Cucumisin-like serine protease (ARA12)                     | At5g67360              | 14%       | TVTSVGGAGTYSVK<br>VEFNISGTSMSCPHVSGLAALLK + Carbamidomethyl (C); Oxidation (M)<br>RVEFNISGTSMSCPHVSGLAALLK + Carbamidomethyl (C); Oxidation (M)<br>AAGGVGMILANTAANGEELVADAHLPPATTVGEK + Oxidation (M)<br>HYVTTDPNPTASISILGTVVGVKPSPVVAAFSSR<br>AAGGVGMILANTAANGEELVADAHLPPATTVGEKAGDIIR + Oxidation (M) |
| 570              | AMP-dependent synthetase or ligase family and GMP synthase | At3g48990 or At1g63660 | 17% or 6% | EGTTVTEEDIK<br>SCSASLAPVILSR + Carbamidomethyl (C)<br>GVPLTQLNLASSVK<br>ATAAPLNAAYTAEFEFYLSDSDSK<br>ISPIEVDVLLTHPDVSVQVAFGVPDEK<br>or<br>ILNVPVGFLK<br>QVDEIFIQSIR<br>SLNVFSLVISGTSSLK<br>K.TVASDEHVICALSGGV DSTVAATLVHK.A + Carbamidomethyl (C)                                                        |
| 571              | Peroxiredoxin type 2                                       | At1g65980              | 38%       | FALLLDDLK<br>VILFGVPGAFTPTCSMK + Carbamidomethyl (C); Oxidation (M)<br>KVILFGVPGAFTPTCSMK + Carbamidomethyl (C); Oxidation (M)<br>APIAVGDVVPDGTISFFDENDQLQTASVHSLAAGK                                                                                                                                   |
| 575              | 20 kDa chaperonin. chloroplast (CPN21)                     | At5g20720              | 41%       | DGSNYIALR<br>YTSIKPLGDR<br>TAGGLLLTETTK<br>YAGTEVEFNDVK<br>ITPLPVSTGSTVLYSK<br>EKPSIGTVIAVGPGLDDEEGK<br>TLGGILLPSTAQSKPQGGEVVAVGEGR                                                                                                                                                                     |
| 576              | Glutathione S-transferase (2.4-D-inducible)                | At1g78370              | 16%       | K.EFIEAVK.I<br>K.FGNFSIESESPK.L<br>K.SLPDSEKIVAYAAEYR.K<br>K.IVAYAAEYR.K                                                                                                                                                                                                                                |
| 579              | glycine-rich protein similar to P23 co-chaperone.          | At4g02450              | 24%       | K.IFLT VVLADTK.D<br>K.IFLT VVLADTKDTK.V<br>K.VNLDPEGVDFSAK.V<br>K.VGPNHVVYELK.L<br>K.LELADKVNVEESK.I<br>R.SIFCIIEK.A<br>R.SIFCIIEK.A Carbamidomethyl                                                                                                                                                    |
| 580              | Elongation factor 1B alpha-subunit 2 (eEF1Balpha2)         | At5g19510              | 31%       | M.AVTFSDLHTEEGVK.S<br>K.TYISGDQLSVDVVK.V<br>K.VYAAVPVKPSDAFPNASK.W<br>R.GVEMPGLFWGASK.L<br>R.GVEMPGLFWGASK.L Oxidation (M)<br>K.LVPVGYGIK.K                                                                                                                                                             |
| 584              | Nucleosome assembly protein (NAP) family protein           | At1g74560 or At1g18800 | 11%       | R.KPVYDK.R<br>K.TFTFL EEGTTK.I<br>K.ITATPIKWK.E                                                                                                                                                                                                                                                         |

## Supplemental Table S2 (continued)

Peptide sequences identified by MS-MS sequencing and corresponding to novel proteins in Arabidopsis seeds identified in this work. % Cov, coverage; AGI, Arabidopsis Genome Initiative.

| No. <sup>a</sup> | Arabidopsis Protein Name.             | AGI No.   | % Cov. | Identified peptides by mass spectrometry                                                                                                                                                                                                                                                                                                                                                                                                                                                                                                                                                                     |
|------------------|---------------------------------------|-----------|--------|--------------------------------------------------------------------------------------------------------------------------------------------------------------------------------------------------------------------------------------------------------------------------------------------------------------------------------------------------------------------------------------------------------------------------------------------------------------------------------------------------------------------------------------------------------------------------------------------------------------|
| 585              | 14-3-3 protein GF14 psi (GRF3) (RCI1) | At5g38480 | 23%    | R.YLAEFK.A<br>R.GKIESELSK.I<br>K.TVDVEELSVEER.N<br>K.SASDIATAELAPTHPIR.L<br>K.SASDIATAELAPTHPIR.L<br>K.LAEQAERYEEMVFEFMEK.V + 2 Oxidation (M)                                                                                                                                                                                                                                                                                                                                                                                                                                                                |
| 586              | Elongation factor 1-alpha             | At5g60390 | 23%    | QTVAVGVK<br>LPLQDVYK<br>IGGIGTVPVGR<br>STTTGHLIYK<br>EHALLAFTLGVK<br>YYCTVIDAPGHR + Carbamidomethyl (C)<br>MTPTKPMVVETTFSEYPLGR + Oxidation (M)<br>MTPTKPMVVETTFSEYPLGR + 2 Oxidation (M)<br>VETGMKPGMVVTFAPTGLTTEVK + 2 Oxidation (M)                                                                                                                                                                                                                                                                                                                                                                       |
| 587              | Expressed protein                     | At5g02240 | 31%    | K.HIVVVGSMGGTNPDPHPLNK.L<br>K.HIVVVGSMGGTNPDPHPLNK.L Oxidation (M)<br>R.KAEQYLADSGTPYTIIR.A<br>R.ELLVGKDELLQTDTK.T<br>K.AFDLGSKPEGTSTPTK.D<br>K.AFDLGSKPEGTSTPTKDFK.A<br>K.ALFSQVTSR.F                                                                                                                                                                                                                                                                                                                                                                                                                       |
| 588              | Glucose and ribitol dehydrogenases    | At3g05260 | 62%    | K.QETQPGIQHVMEPTPEFSSSNYKPSNK.L<br>K.QETQPGIQHVMEPTPEFSSSNYKPSNK.L Oxidation (M)<br>K.VALVTGGDSGIGK.A<br>K.AVCHCYALEGASVAFTYVK.G<br>K.AVCHCYALEGASVAFTYVK.G 2 Carbamidomethyl (C)<br>K.GREDKDAEETLR.L<br>R.EAKEPIMIATDLGFEENCK.R<br>R.EAKEPIMIATDLGFEENCK.R Oxidation (M)<br>R.EAKEPIMIATDLGFEENCK.R Carbamidomethyl (C)<br>R.VVEEVVNSFGR.I<br>R.IDVLVNCAAEQHEVSIEDIDEAR.L<br>R.IDVLVNCAAEQHEVSIEDIDEAR.L Carbamidomethyl (C)<br>R.IDVLVNCAAEQHEVSIEDIDEARLER.V<br>R.IDVLVNCAAEQHEVSIEDIDEARLER.V Carbamidomethyl (C)<br>R.TNIFSQFFLVK.Y<br>K.EGSSIINTTSVVAYAGNSSLLEYTATK.G<br>K.GAIVSFTR.G<br>R.GLALQLAPK.G |
| 590              | Cinnamoyl-CoA reductase               | At5g58490 | 30%    | R.GYSVHATVK.N<br>K.QLLDPVK.G<br>K.GTINVLTAKE.E<br>K.AAWFEAEK.G<br>R.HLCVEAISHYGDFVAK.V<br>R.HLCVEAISHYGDFVAK.V Carbamidomethyl (C)<br>K.VAELYPNYNVPK.L<br>K.VAELYPNYNVPKLPKPR.E<br>R.ETQPGLLR.D<br>K.LIDLGLK.F<br>K.FISMEEIIEKGVESLK.S<br>K.FISMEEIIEKGVESLK.S Oxidation (M)                                                                                                                                                                                                                                                                                                                                 |

## Supplemental Table S2 (continued)

Peptide sequences identified by MS-MS sequencing and corresponding to novel proteins in Arabidopsis seeds identified in this work. % Cov, coverage; AGI, Arabidopsis Genome Initiative.

| No. <sup>a</sup> | Arabidopsis Protein Name.                                     | AGI No.   | % Cov. | Identified peptides by mass spectrometry                                                                                                                                                                                                                                                                                                                                                                                                               |
|------------------|---------------------------------------------------------------|-----------|--------|--------------------------------------------------------------------------------------------------------------------------------------------------------------------------------------------------------------------------------------------------------------------------------------------------------------------------------------------------------------------------------------------------------------------------------------------------------|
| 592              | Ketol-acid reductoisomerase. chloroplast precursor            | At3g58610 | 13%    | HLPDAFK<br>NISVVAVCPK + Carbamidomethyl (C)<br>NTVECITGTISR + Carbamidomethyl (C)<br>GVSFMVDNCSTAR + Carbamidomethyl (C)<br>GVSFMVDNCSTAR + Carbamidomethyl (C); Oxidation (M)<br>EGLPAFFPMGNIDQTR + Oxidation (M)<br>QIGVIGWGSQGPAQAQNL                                                                                                                                                                                                               |
| 593              | T-complex protein 1. beta subunit (TCP-1-beta)                | At5g20890 | 22%    | SHAIEAFSR<br>SLHIDNPAAK<br>VDEIITCAPR + Carbamidomethyl (C)<br>GSTNLEAIQIK<br>MASFVGAMAISDLVK + 2 Oxidation (M)<br>SLHDALCVLSQTVNDTR + Carbamidomethyl (C)<br>RIENANILVANTAMDTDKVK + Oxidation (M)<br>ALVAIPTTIADNAGLDSAELVAQL                                                                                                                                                                                                                         |
| 614              | Aspartyl-tRNA synthetase                                      | At4g31180 | 26%    | KVYCINK + Carbamidomethyl (C)<br>AGECGIDVK + Carbamidomethyl (C)<br>LPLSVEDAAR<br>TISTYIDFR<br>VHIPEVLEQR<br>LTFEEGVQMLK<br>LTFEEGVQMLK + Oxidation (M)<br>LMAGSSEGGSAVFR + Oxidation (M)<br>VVMLFCALNNIR + Carbamidomethyl (C)<br>VVMLFCALNNIR + Carbamidomethyl (C); Oxidation (M)<br>SLAKLPLSVEDAAR<br>ESFVDVIGVVTLPK<br>ESGSTVQCVVVSQSEK + Carbamidomethyl (C)<br>EPLTGTTQQVEIQVR<br>SEADIEASLQTPSPAAR<br>ESGSTVQCVVVSQSEKTK + Carbamidomethyl (C) |
| 705              | Beta-cruciferin 12S (seed storage protein precursor fragment) | At1g03880 | 44%    | K.FEWISFK.T<br>R.GVLQGNAMVLPK.Y + Oxidation (M)<br>K.TNENAMISTLAGR.T<br>K.IKFNTLETTLTR.A<br>R.IQVVNDNGQNVLDQQVQK.G<br>R.ALPLEVISNGFQISPEAR.K<br>K.GQLVVIPQGFAYVVQSHGNK.F                                                                                                                                                                                                                                                                               |
| 728              | Phosphoenolpyruvate carboxykinase (ATP)                       | At4g37870 | 11%    | R.IKLAYTR.K<br>K.YAAMLAEK.M<br>K.IIDAIHSGSLLK.A<br>K.IIDAIHSGSLLK.A<br>R.AAYPIEFIPNAK.I<br>R.EKEPDIWNAIK.F<br>R.KIIDAIHSGSLLK.A<br>R.DATTEDELWWGK.G<br>R.EVDYSDKSVTENTR.A                                                                                                                                                                                                                                                                              |

## Supplemental Table S2 (continued)

Peptide sequences identified by MS-MS sequencing and corresponding to novel proteins in Arabidopsis seeds identified in this work. % Cov, coverage; AGI, Arabidopsis Genome Initiative.

| No. <sup>a</sup> | Arabidopsis Protein Name.                                              | AGI No.                                   | % Cov. | Identified peptides by mass spectrometry                                                                                                                                                                                                                                                                                                                                                 |
|------------------|------------------------------------------------------------------------|-------------------------------------------|--------|------------------------------------------------------------------------------------------------------------------------------------------------------------------------------------------------------------------------------------------------------------------------------------------------------------------------------------------------------------------------------------------|
| 729              | S-adenosyl-L-homocysteine hydrolase                                    | At4g13940                                 | 18%    | R.TEFGPSQPFK.G<br>K.AEEIFEK.T<br>R.LVGVSEETTTGVK.R<br>R.LVGVSEETTTGVKR.L<br>K.SKFDNLYGCR.H<br>K.SKFDNLYGCR.H Carbamidomethyl (C)<br>K.FDNLYGCR.H<br>K.FDNLYGCR.H Carbamidomethyl (C)<br>R.HSLPDGLMR.A<br>R.ATDVMIA GK.V<br>K.VAVICGYGDV GK.G<br>K.VAVICGYGDV GK.G Carbamidomethyl (C)<br>K.VAVICGYGDV GKGC AAAMK.T<br>K.VAVICGYGDV GKGC AAAMK.T 2 Carbamidomethyl (C)<br>K.AGIIVLA EGR.L |
| 731              | Cell division cycle protein (CDC48)                                    | At3g09840 or<br>At5g03340 or<br>At3g53230 | 6%     | K.DFSTAILERK.K<br>R.VRLGDVISVHQCPDVK.Y Carbamidomethyl (C)<br>R.LGDVISVHQCPDVK.Y Carbamidomethyl (C)<br>K.GILLYGPPGSGK.T<br>K.LAEDVDLER.I<br>K.GVLFYGP PGCGK.T Carbamidomethyl (C)                                                                                                                                                                                                       |
| 732              | Heat shock protein                                                     | At1g79930                                 | 4%     | K.ILSHAFDR.S<br>R.GCALQCAILSPTFK.V 2 Carbamidomethyl (C)<br>K.NAVESYVYDMR.N Oxidation (M)<br>K.VGDPVEVR.Y                                                                                                                                                                                                                                                                                |
| 739              | Alpha-cruciferin 12S (Seed storage protein fragment)                   | At5g44120                                 | 47%    | ~.MGKVIPGCAETFQDSSEFQPR.F Oxidation (M)<br>R.FRDMHQKVEHIR.S<br>R.FRDMHQKVEHIR.S Oxidation (M)<br>R.DMHQKVEHIR.S<br>K.IDLQTAQQLQNQDDNR.G<br>R.VQGPFGVIRPPLR.G                                                                                                                                                                                                                             |
| 741              | Succinate-semialdehyde dehydrogenase (SSADH1)                          | At1g79440                                 | 8%     | K.ITFTGSTAVGKK.L<br>R.HSLGMTFYEPTVIR.D Oxidation (M)<br>K.EEIFGPVAPLIR.F<br>R.FKTEEDAIR.I                                                                                                                                                                                                                                                                                                |
| 775              | 6-phosphogluconate dehydrogenase NAD-binding domain-containing protein | At3g25530                                 | 23%    | K.INEAITGK.G<br>R.FVEGVPVSGSK.K<br>K.SSYPFAFPLK.H<br>K.GGVLEQICEGK.G + Carbamidomethyl (C)<br>R.SFYLGQVGN GAK.M<br>K.KPAEDGQLIILAAGDK.A                                                                                                                                                                                                                                                  |

## Supplemental Table S2 (continued)

Peptide sequences identified by MS-MS sequencing and corresponding to novel proteins in Arabidopsis seeds identified in this work. % Cov, coverage; AGI, Arabidopsis Genome Initiative.

| No. <sup>a</sup> | Arabidopsis Protein Name.                                               | AGI No.   | % Cov. | Identified peptides by mass spectrometry                                                                                                                                                                                                                                                                                                                                                                                                                                                                                                                                                                                                                     |
|------------------|-------------------------------------------------------------------------|-----------|--------|--------------------------------------------------------------------------------------------------------------------------------------------------------------------------------------------------------------------------------------------------------------------------------------------------------------------------------------------------------------------------------------------------------------------------------------------------------------------------------------------------------------------------------------------------------------------------------------------------------------------------------------------------------------|
| 810              | ATP-dependent Clp protease ATP-binding subunit / ClpC                   | At5g50920 | 23%    | K.EIADILLK.E<br>R.ELEKELR.Q<br>R.DREIELR.A<br>R.IIGQDEAVK.A<br>R.LDEMIVFR.Q<br>K.TAIAEGLAQR.I<br>R.LDEMIVFR.Q + Oxidation (M)<br>R.LLEDSMAEK.M + Oxidation (M)<br>K.YRGEFEER.L<br>K.RIIGQDEAVK.A<br>R.LDMSEFMER.H<br>R.VLELSLEEAR.Q<br>K.AIDLIDEAGSR.V<br>K.VIMLAQEER.R<br>R.LDMSEFMER.H + Oxidation (M)<br>K.VIMLAQEER.R + Oxidation (M)<br>K.HIEKDPALER.R<br>R.LRHAQVPPEAR.E<br>R.IASGDVPETIEGK.K<br>K.NNPCLIGEPGVGK.T + Carbamidomethyl (C)<br>K.HIEKDPALERR.F<br>K.QYFRPEFLNR.L<br>K.LAEEGKLDPVVGR.Q<br>R.VLENLGADPSNIR.T<br>K.MPTLEEYGTNLTK.L + Oxidation (M)<br>R.HAQVPEEARELEK.E<br>R.TKNNPCLIGEPGVGK.T + Carbamidomethyl (C)<br>R.VVDEGYNPSYGARPLR.R |
| 1137             | TATA box-binding protein-interacting protein                            | At5g22330 | 17%    | K.GLGLLEPTGIPIK.L<br>K.LAAGFVQLEAR.E<br>R.EAAGLVVDMIKQKK.M<br>R.EAAGLVVDMIKQKK.M Oxidation (M)<br>K.ALLLAGPPGTGKTALALGISQELGSKVPPFCPMVGSEVYSSEV<br>K.K                                                                                                                                                                                                                                                                                                                                                                                                                                                                                                       |
| 1138             | Expressed protein                                                       | At5g45690 | 16%    | K.GLAVDIIETEMQK.L + Oxidation (M)<br>K.RDDEYGISTESLK.T<br>K.KRDDEYGISTESLK.T<br>R.VPELVAKTELENIK.T                                                                                                                                                                                                                                                                                                                                                                                                                                                                                                                                                           |
| 1151             | Glutathione S-transferase                                               | At2g30870 | 18%    | R.SQGPDLLGK.T<br>M.VLTIYAPLFASSK.R<br>M.VLTIYAPLFASSK.A<br>K.GVSFETVNVVDMKGEQR.Q + Oxidation (M)                                                                                                                                                                                                                                                                                                                                                                                                                                                                                                                                                             |
| 1153             | Beta-cruciferin 12S (seed storage protein precursor fragment)           | At4g28520 | 39%    | K.AHIQMVNDNGER.V<br>K.TNENAQVNTLAGR.T<br>K.AHIQMVNDNGER.V + Oxidation (M)<br>K.HAIGEQFEWIEFK.T<br>R.GLPLEVITNGYQISPEEAK.R                                                                                                                                                                                                                                                                                                                                                                                                                                                                                                                                    |
| 1154             | Alpha-cruciferin 12S (Seed storage protein fragment)                    | At5g44120 | 5%     | K.NIFNGFGPEVIAQALK.I<br>R.VQGPFGVIRPPLR.G<br>R.LSALRGSIR.Q                                                                                                                                                                                                                                                                                                                                                                                                                                                                                                                                                                                                   |
| 1155             | Alpha/beta-cruciferin 12S (Seed storage protein fragment) plus de Alpha | At5g44120 | 17%    | K.IDLQTAQQLQNQDDNR.G<br>R.VQGPFGVIRPPLR.G<br>R.CTDNLDDPSR.A                                                                                                                                                                                                                                                                                                                                                                                                                                                                                                                                                                                                  |

---

## Supplemental Table S2 (continued)

---

Peptide sequences identified by MS-MS sequencing and corresponding to novel proteins in Arabidopsis seeds identified in this work. % Cov, coverage; AGI, Arabidopsis Genome Initiative.

---

| No. <sup>a</sup> | Arabidopsis Protein Name.                                        | AGI No.   | % Cov. | Identified peptides by mass spectrometry                                                                                                    |
|------------------|------------------------------------------------------------------|-----------|--------|---------------------------------------------------------------------------------------------------------------------------------------------|
| 1156             | Beta-cruciferin 12S<br>(seed storage protein precursor fragment) | At5g44120 | 41%    | R.VFDGQVSQGQLIAVPQGFSVVKR.A<br>R.ATSNRFQWVEFK.T<br>R.FQWVEFK.T<br>K.TNANAQINTLAGR.T<br>R.GLPLEVITNGFQISPEEAR.R<br>K.FNTLETTLTHSSGPASYGRPR.V |

---

<sup>a</sup>Protein numbering following Arabidopsis seed protein reference maps available on this web site: <http://www.seed-proteome.com>

---
